# Supplementary material for: Repetita iuvant. The extraordinary evolutionary history of the endemic palm Chamaerops humilis L. in the Mediterranean
Source: Research Square preprint supplement (doi:10.21203/rs.3.rs-6595308/v1), 2025-05-06
Supplement: Supplementary file 1 [file fb4868fe52791efac7a2f477.xlsx]

## Sheet: Supplementary Table 5
GO.ID	Term	Group Classification	Rank_elimKs	classicKS	elimKS
GO:0007035	vacuolar acidification	Cell transport and dynamics	1	8e-15	8e-15
GO:0006310	DNA recombination	Genomic Plasticity and DNA Regulation	2	5.6e-14	3.5e-13
GO:0045128	negative regulation of reciprocal meiotic recombination	Genomic Plasticity and DNA Regulation	3	2.4e-08	2.4e-08
GO:0036258	multivesicular body assembly	Cell transport and dynamics	4	4.2e-08	4.2e-08
GO:0006075	(1->3)-beta-D-glucan biosynthetic process	Metabolism and energy adaptation	5	5.5e-08	5.5e-08
GO:0006896	Golgi to vacuole transport	Cell transport and dynamics	6	1e-07	1e-07
GO:0090502	RNA phosphodiester bond hydrolysis, endonucleolytic		7	1.8e-07	1.8e-07
GO:0070676	intralumenal vesicle formation	Cell transport and dynamics	8	4.9e-07	4.9e-07
GO:0036297	interstrand cross-link repair	Genomic Plasticity and DNA Regulation	9	3.6e-06	3.6e-06
GO:0045842	positive regulation of mitotic metaphase/anaphase transition	Genomic Plasticity and DNA Regulation	10	3.7e-06	3.7e-06
GO:0015969	guanosine tetraphosphate metabolic process	Environmental stimuli and stress	11	1e-05	1e-05
GO:0042147	retrograde transport, endosome to Golgi	Cell transport and dynamics	12	1.5e-05	1.5e-05
GO:0042631	cellular response to water deprivation	Environmental stimuli and stress	13	2.3e-05	2.3e-05
GO:0015979	photosynthesis	Metabolism and energy adaptation	14	3.1e-06	4.4e-05
GO:0030042	actin filament depolymerization	Cell development, differentiation and organisation	15	8.3e-07	5.1e-05
GO:0032196	transposition	Genomic Plasticity and DNA Regulation	16	5.9e-05	5.9e-05
GO:1902969	mitotic DNA replication		17	7.6e-05	7.6e-05
GO:0015886	heme transport		18	0.00013	0.00013
GO:0071173	spindle assembly checkpoint signaling	Genomic Plasticity and DNA Regulation	19	0.00015	0.00015
GO:0006274	DNA replication termination	Genomic Plasticity and DNA Regulation	20	0.00015	0.00015
GO:0009790	embryo development	Cell development, differentiation and organisation	21	0.00023	0.00015
GO:0045910	negative regulation of DNA recombination	Genomic Plasticity and DNA Regulation	22	9.6e-07	0.00017
GO:2000022	regulation of jasmonic acid mediated signaling pathway	Environmental stimuli and stress	23	0.00018	0.00018
GO:0071174	mitotic spindle checkpoint signaling	Genomic Plasticity and DNA Regulation	24	0.00025	0.00025
GO:0016036	cellular response to phosphate starvation	Environmental stimuli and stress	25	0.00026	0.00026
GO:0045841	negative regulation of mitotic metaphase/anaphase transition	Genomic Plasticity and DNA Regulation	26	0.00031	0.00031
GO:0015918	sterol transport	Metabolism and energy adaptation	27	0.00039	0.00039
GO:0006888	endoplasmic reticulum to Golgi vesicle-mediated transport	Cell transport and dynamics	28	0.00043	0.00043
GO:0006260	DNA replication	Genomic Plasticity and DNA Regulation	29	9.7e-07	0.00047
GO:0006145	purine nucleobase catabolic process		30	0.00054	0.00054
GO:0010136	ureide catabolic process		31	0.00054	0.00054
GO:0010227	floral organ abscission	Cell development, differentiation and organisation	32	0.00063	0.00063
GO:0015748	organophosphate ester transport		33	0.00069	0.00069
GO:0009060	aerobic respiration	Metabolism and energy adaptation	34	0.00061	0.00073
GO:1901606	alpha-amino acid catabolic process	Metabolism and energy adaptation	35	3.7e-05	0.00074
GO:0032508	DNA duplex unwinding		36	0.00076	0.00076
GO:0090359	negative regulation of abscisic acid biosynthetic process		37	0.00085	0.00085
GO:0009875	pollen-pistil interaction	Environmental stimuli and stress	38	0.0011	0.0011
GO:0006270	DNA replication initiation	Genomic Plasticity and DNA Regulation	39	0.00112	0.00112
GO:0090378	seed trichome elongation	Cell development, differentiation and organisation	40	0.00113	0.00113
GO:0007188	adenylate cyclase-modulating G protein-coupled receptor signaling pathway		41	0.00115	0.00115
GO:0008295	spermidine biosynthetic process		42	0.0012	0.0012
GO:0042138	meiotic DNA double-strand break formation	Cell transport and dynamics	43	0.00121	0.00121
GO:0019058	viral life cycle		44	0.00122	0.00122
GO:1904666	regulation of ubiquitin protein ligase activity	Cell transport and dynamics	45	0.00124	0.00124
GO:0006002	fructose 6-phosphate metabolic process	Metabolism and energy adaptation	46	0.00125	0.00125
GO:0071108	protein K48-linked deubiquitination	Cell transport and dynamics	47	0.00131	0.00131
GO:0015711	organic anion transport		48	0.00134	0.00134
GO:0009658	chloroplast organization		49	0.00141	0.00141
GO:0034063	stress granule assembly	Cell transport and dynamics	50	0.00141	0.00141
GO:0009793	embryo development ending in seed dormancy		51	0.00148	0.00148
GO:0001522	pseudouridine synthesis		52	0.0015	0.0015
GO:0031145	anaphase-promoting complex-dependent catabolic process		53	0.00157	0.00157
GO:0080009	mRNA methylation	Cell development, differentiation and organisation	54	0.00171	0.00171
GO:0006887	exocytosis	Cell transport and dynamics	55	0.00172	0.00172
GO:0008654	phospholipid biosynthetic process		56	0.00178	0.00178
GO:0042773	ATP synthesis coupled electron transport	Metabolism and energy adaptation	57	0.00179	0.00179
GO:0006886	intracellular protein transport	Cell transport and dynamics	58	0.00195	0.00195
GO:0010197	polar nucleus fusion		59	0.00197	0.00197
GO:1902532	negative regulation of intracellular signal transduction		60	0.00218	0.00218
GO:0046395	carboxylic acid catabolic process		61	8.9e-07	0.0023
GO:0006065	UDP-glucuronate biosynthetic process		62	0.00243	0.00243
GO:0015031	protein transport	Cell transport and dynamics	63	9.9e-06	0.00251
GO:0070475	rRNA base methylation		64	0.00261	0.00261
GO:0009741	response to brassinosteroid	Environmental stimuli and stress	65	0.00268	0.00268
GO:0010088	phloem development		66	0.0028	0.0028
GO:1903288	positive regulation of potassium ion import across plasma membrane		67	0.00281	0.00281
GO:0009084	glutamine family amino acid biosynthetic process	Metabolism and energy adaptation	68	0.00281	0.00281
GO:0035435	phosphate ion transmembrane transport		69	0.00286	0.00286
GO:0015833	peptide transport		70	0.00295	0.00295
GO:0044000	movement in host		71	0.003	0.003
GO:0006378	mRNA polyadenylation	Cell development, differentiation and organisation	72	0.00302	0.00302
GO:0048268	clathrin coat assembly		73	0.00312	0.00312
GO:0031554	regulation of termination of DNA-templated transcription	Cell development, differentiation and organisation	74	0.00333	0.00333
GO:0008360	regulation of cell shape		75	0.0034	0.0034
GO:0006370	7-methylguanosine mRNA capping	Cell development, differentiation and organisation	76	0.0034	0.0034
GO:0016540	protein autoprocessing		77	0.00341	0.00341
GO:0006096	glycolytic process	Metabolism and energy adaptation	78	0.00347	0.00347
GO:0009063	cellular amino acid catabolic process	Metabolism and energy adaptation	79	0.00018	0.00347
GO:0051205	protein insertion into membrane		80	0.0035	0.0035
GO:0070987	error-free translesion synthesis		81	0.00362	0.00362
GO:0051693	actin filament capping	Cell development, differentiation and organisation	82	0.00375	0.00375
GO:0031297	replication fork processing	Genomic Plasticity and DNA Regulation	83	0.0038	0.0038
GO:0071241	cellular response to inorganic substance	Environmental stimuli and stress	84	0.00383	0.00383
GO:0006012	galactose metabolic process		85	0.0039	0.0039
GO:1902074	response to salt	Environmental stimuli and stress	86	0.00401	0.00401
GO:0051129	negative regulation of cellular component organization		87	3e-06	0.00406
GO:0030261	chromosome condensation	Cell development, differentiation and organisation	88	0.0041	0.0041
GO:0046470	phosphatidylcholine metabolic process	Metabolism and energy adaptation	89	0.00419	0.00419
GO:0019216	regulation of lipid metabolic process	Metabolism and energy adaptation	90	0.00124	0.00421
GO:0019477	L-lysine catabolic process		91	0.00442	0.00442
GO:0006334	nucleosome assembly		92	0.00447	0.00447
GO:0045089	positive regulation of innate immune response		93	0.00449	0.00449
GO:0051754	meiotic sister chromatid cohesion, centromeric		94	0.00468	0.00468
GO:0033692	cellular polysaccharide biosynthetic process		95	1.5e-07	0.00475
GO:0009139	pyrimidine nucleoside diphosphate biosynthetic process		96	0.00487	0.00487
GO:0009416	response to light stimulus		97	0.00487	0.00487
GO:0015909	long-chain fatty acid transport		98	0.00496	0.00496
GO:0033962	P-body assembly	Cell development, differentiation and organisation	99	0.00529	0.00529
GO:1901259	chloroplast rRNA processing		100	0.00534	0.00534
